# Supplementary material for: SARS-CoV-2 Membrane Glycoprotein M Triggers Apoptosis With the Assistance of Nucleocapsid Protein N in Cells
Source: PubMed Central journal article supplement (PMC8425412; doi:10.3389/fcimb.2021.706252), 2021-08-25
Supplement: DataSheet_1.pdf [file DataSheet_1.pdf]

**Figure S1**

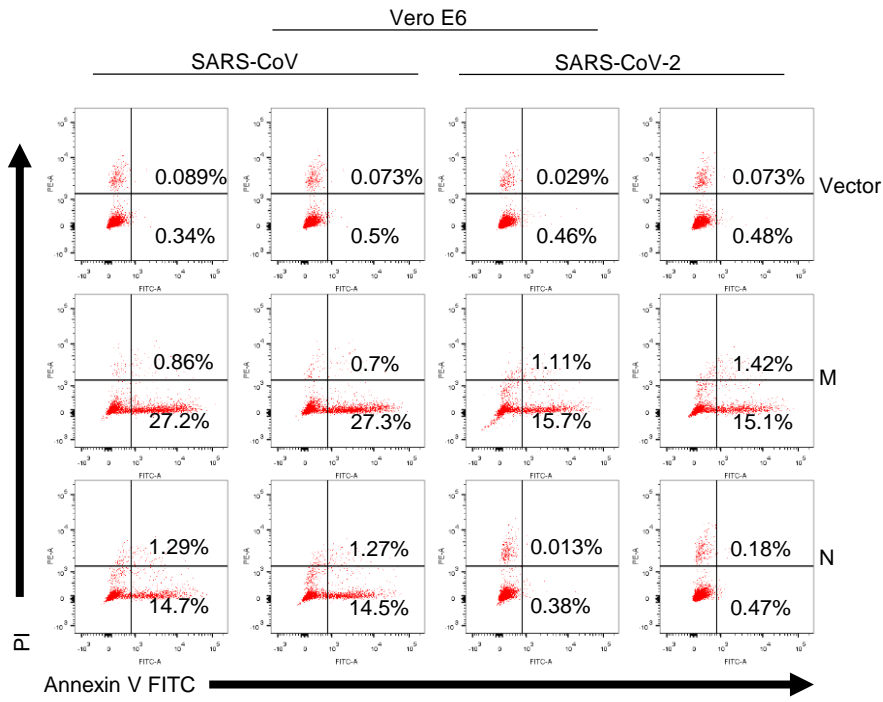

**Figure S1.** Ver0 E6 cells were transfected with vector, FLAG-SARS-CoV-2 M or FLAG-SARS-CoV-2 N. After 24h, cells were treated with Annexin V-FITC/ PI for flow cytometry analysis.

## Figure S2

A

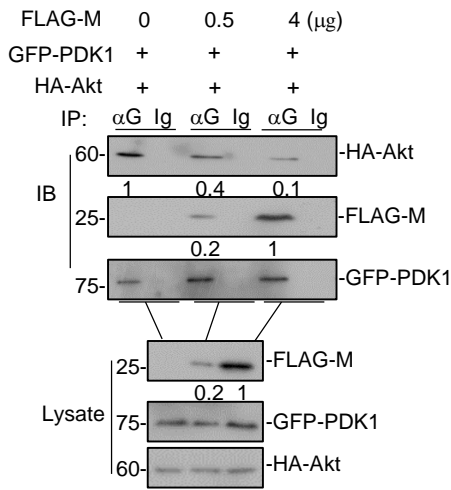

B

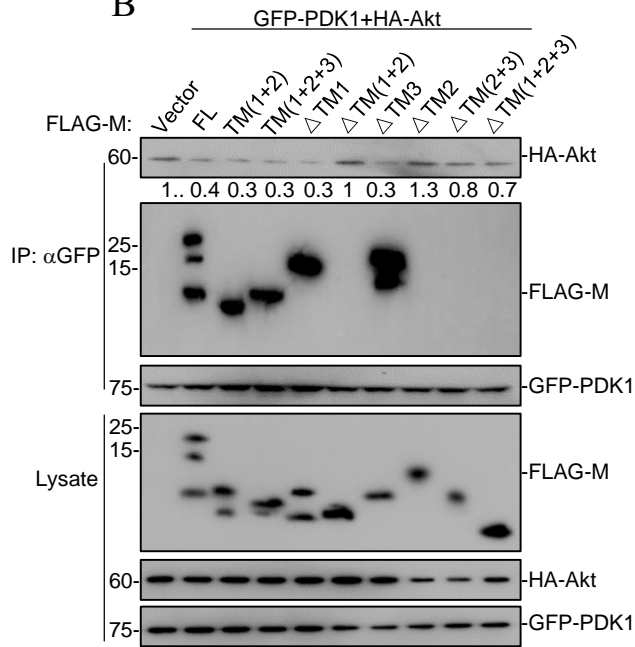

**Figure S2.** (A) HEK293T cells transfected with GFP-PDK1 and HA-Akt together with vector or FLAG-SARS-CoV-2 M (0.5 $\mu$ g or 4 $\mu$ g). After 24h, cells were collected for co-immunoprecipitation (with anti-GFP or IgG) and western blotting (with anti-GFP, anti-HA or anti-FLAG). (B) HEK293T cells transfected with GFP-PDK1 and HA-Akt together with vector or FLAG-SARS-CoV-2 M and its mutants. After 24h, cells were collected for co-immunoprecipitation (with anti-GFP or IgG) and western blotting (with anti-GFP, anti-HA or anti-FLAG). The densities of blots were analyzed with ImageJ software.

**Figure S3**

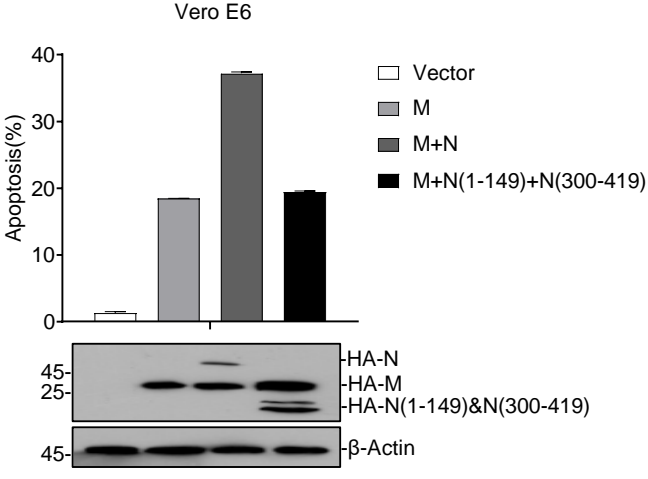

**Figure S3.** Vero E6 cells transfected with vector, HA-SARS-CoV-2 M together with HA-SARS-CoV-2 N or with HA-SARS-CoV-2 N(1-149)+N(300-419). After 24h, cells were stained with Annexin V-FITC/ PI for flow cytometry analysis, and the percentage of apoptotic cells were measured.

**Figure S4**

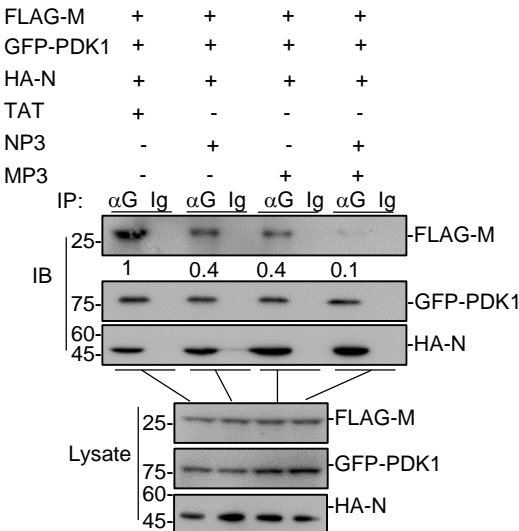

**Figure S4.** HEK293T cells transfected with GFP-PDK1, HA-Akt together with FLAG-SARS-CoV-2 M and treated with TAT, NP3, TM3 and NP3+MP3, respectively. After 24h, cells were collected for co-immunoprecipitation (with anti-GFP or IgG) and western blotting (with anti-GFP, anti-HA or anti-FLAG). The densities of blots were analyzed with ImageJ software.
